# Supplementary material
Source: HighWire-hosted journal article supplement (https://thorax.bmj.com/highwire/filestream/174107/field_highwire_adjunct_files/1/634322webonlyfig.pdf)

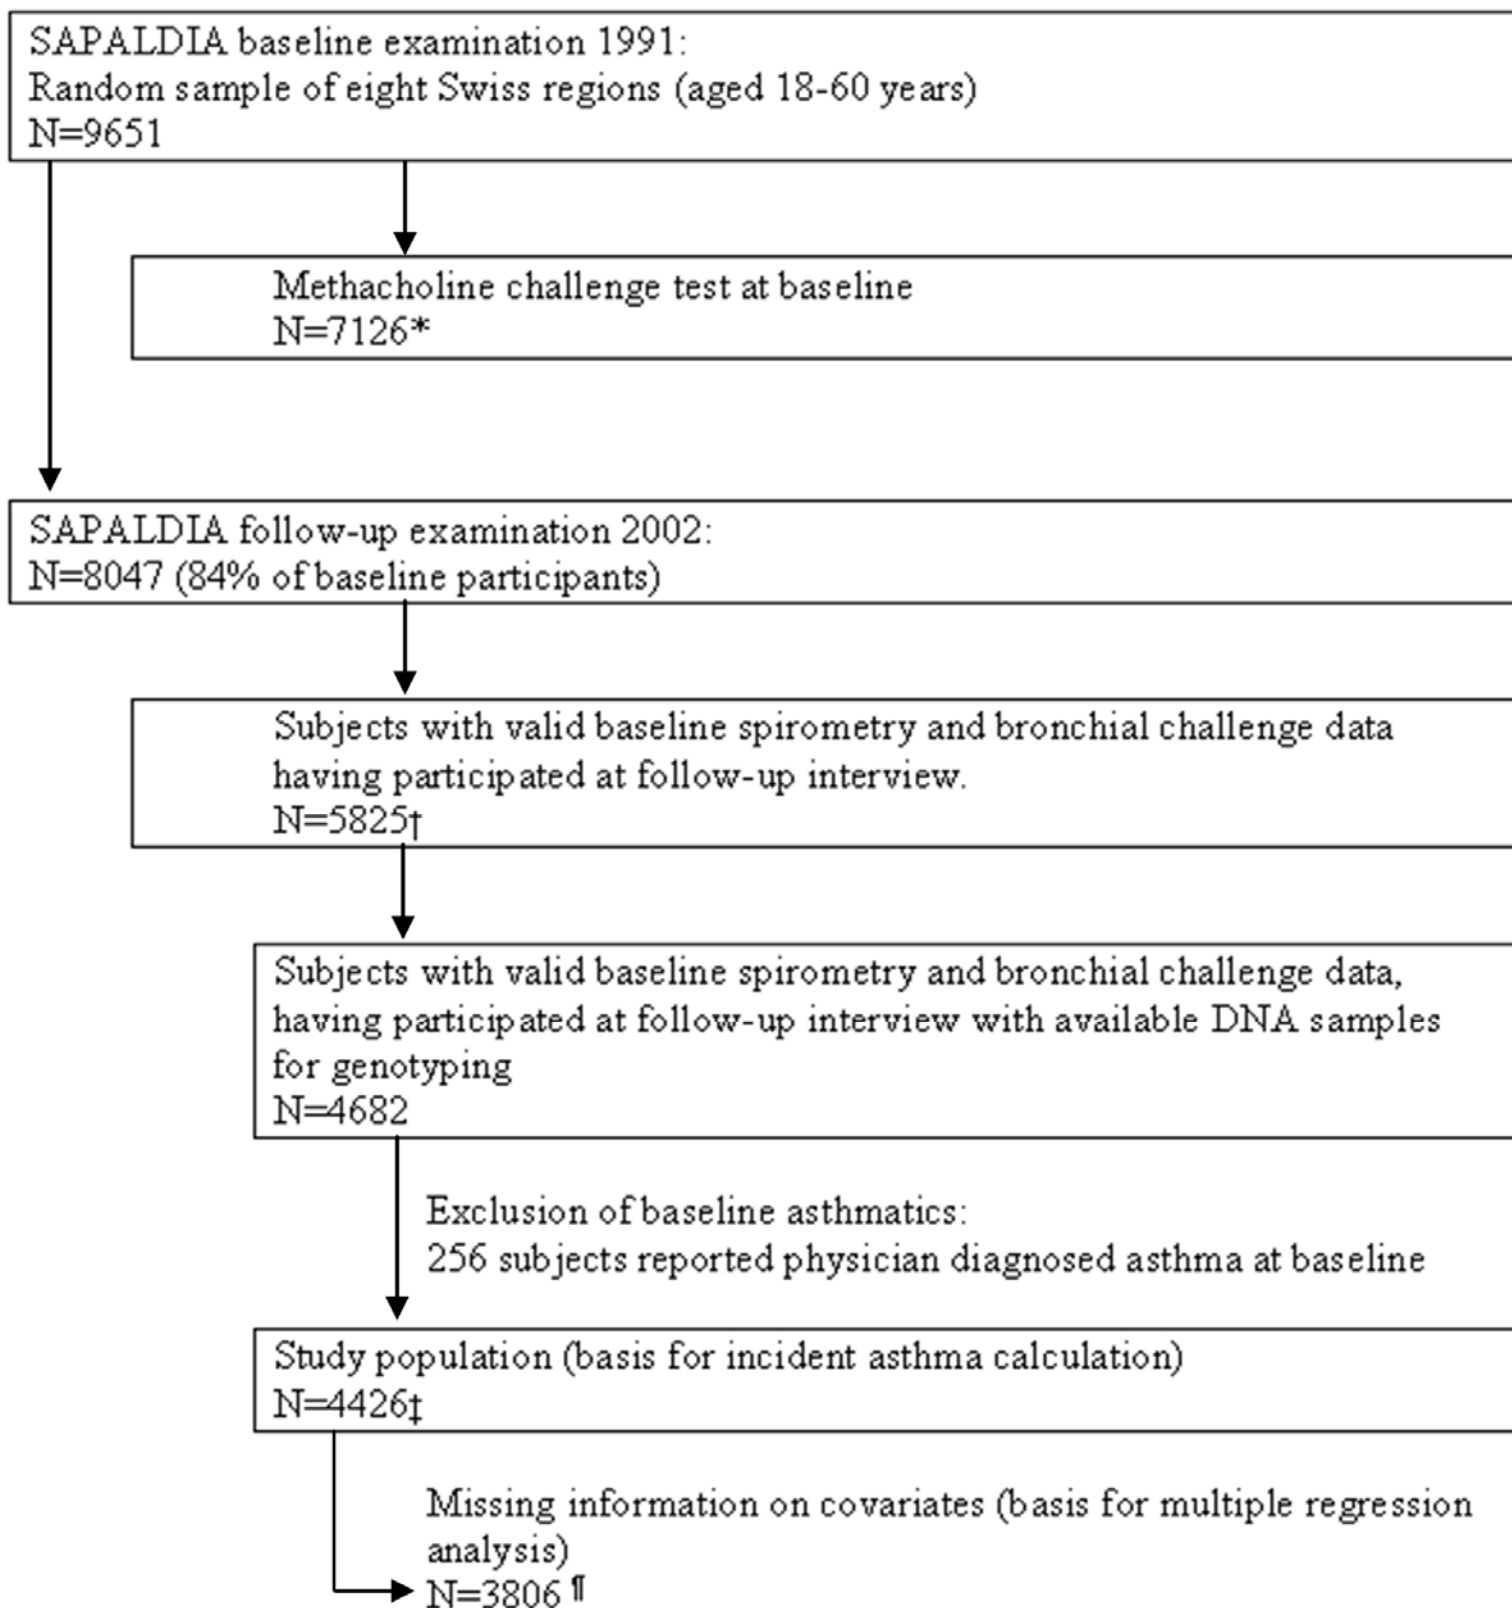

Supplement: 634322webonlyfig.pdf [file 634322webonlyfig.pdf]
